# Supplementary material for: Mineralomimetic host–guest chemistry: the encapsulation of [M+⊂[2.2.2]cryptate] (M = Na, K) by saddle shaped Ni(ii) macrocycles
Source: Royal Society of Chemistry journal article supplement (doi:10.1039/b111197n), 2002-01-01
Supplement: b111197n.doc [file b111197n.doc]

**Mineralomimetic host-guest chemistry: the encapsulation of [M+[2.2.2]cryptate] (M = Na, K) by saddle shaped Ni(II) macrocycles**

Michaele J. Hardie, Nino Malic, and Colin L. Raston

# Supplementary data

# *Experimental Section*

Synthesis of [K****[2.2.2]cryptate][(CB11H12)][Ni(TMTAA)]3 **4**: Cs(CB11H­12) (15 mg, 54.4 mol), [2.2.2]cryptand (20 mg, 53.1 mol) and KPF6 (10 mg, 54.3 mol) were dissolved in acetone (*ca* 5 ml). The solvent was then removed *in vacuo* and the residue extracted with CH2Cl2. The CH2Cl2 extracts were filtered and solvent removed, then Ni(TMTAA) (22 mg, 54.9 mol) was added to the residue and the mixture dissolved in a 1:1 mixture of CH2Cl2/toluene (*ca* 6 ml), then allowed to evaporate slowly. After two weeks the large purple/black cubic crystals which formed were filtered and quickly washed with a small amount of ethyl acetate, then dried in air [19 mg, 59% with respect to Ni(TMTAA)]. m.p. 280-283C. Elemental analysis calcd for C85H114B11KN14Ni3O6 (%): C 57.94, H 6.52, N 11.13; found: C 58.85, H 7.00, N 11.23. 1H NMR (300 MHz, CDCl3, 25C): **= 2.06 (s, 36H; CH3), 2.53 (t, 3*J*(H,H)=4.5 Hz, 12H; NCH2), 3.53 (t, 3*J*(H,H)=4.5 Hz, 12H; NCH2C*H*2), 3.60 (s, 12H; OCH2), 4.84 (s, 6H; CH), 6.52-6.57 (m, 12H; ArH), 6.65-6.70 (m, 12H; ArH).

Synthesis of [Na****[2.2.2]cryptate][(CB11H12)][Ni(TMTAA)]3 **5**: Using the above procedure with Cs(CB11H­12) (15 mg, 54.4 mol), [2.2.2]cryptand (20 mg, 53.1 mol) and NaI (9 mg, 60 mol) dissolved initially in methanol (*ca* 5 ml). NiTMTAA (65 mg, 163 mol) added to the white residue obtained (30 mg) and dissolved in CH2Cl2/toluene. Slow evaporation over several days yielded large dark purple crystals. [43 mg, 45% with respect to Cs(CB11H­12)]. m.p. 288C. Elemental analysis calcd for C85H114B11N14NaNi3O6 (%): C 58.47, H 6.58, N 11.23; found: C 58.56, H 6.69, N 11.21. 1H NMR (300 MHz, CDCl3, 25C): **= 2.06 (s, 36H; CH3), 2.64 (t, 3*J*(H,H)=4.5 Hz, 12H; NCH2), 3.57 (t, 3*J*(H,H)=4.5 Hz, 12H; NCH2C*H*2), 3.61 (s, 12H; OCH2), 4.84 (s, 6H; CH), 6.52-6.57 (m, 12H; ArH), 6.65-6.70 (m, 12H; ArH).
